# Supplementary material for: Generally applicable circulating tumor cell enrichment and identification through a membrane glycoprotein–targeting strategy combining magnetic isolation and biological orthogonality labeling
Source: Royal Society of Chemistry journal article supplement (doi:10.1039/d4tb00073k), 2024-01-01
Supplement: d4tb00073k1.pdf [file d4tb00073k1.pdf]

## Electronic Supplementary Material

### Supplementary information

#### **Generally Applicable Circulating Tumor Cell Enrichment and Identification Through the Membrane Glycoprotein-targeted Strategy Combining Magnetic Isolation and Biological Orthogonality Labeling.**

Yue Yu,<sup>a</sup> Yating Zeng,<sup>a</sup> Ke Kang,<sup>a</sup> Yu Chen,<sup>\*b</sup> Yao Wu,<sup>a</sup> Qiangying Yi<sup>\*a</sup>

#### **Corresponding Authors**

<sup>\*</sup>Yu Chen, Dr., Associate professor, E-mail: [polyb@163.com](mailto:polyb@163.com); <sup>\*</sup>Qiangying Yi, Dr., Professor, E-mail: [qyi@scu.edu.cn](mailto:qyi@scu.edu.cn).

<sup>a</sup>National Engineering Research Center for Biomaterials, Sichuan University, Chengdu 610064, P. R. China

<sup>b</sup>Department of Cardiology, Sichuan Academy of Medical Science & Sichuan Provincial People's Hospital, University of Electronic Science and Technology of China, Chengdu 610072, China

#### **RESULTS AND DISCUSSIONS**

##### **characterization of the FITC labeled transferrin**

The properties of Tf-FITC were characterized by ultraviolet spectrometer and fluorescence spectrophotometer, as shown in Figure S1c and S1d. The characteristic absorption peaks of transferrin and FITC appeared simultaneously in the ultraviolet-visible absorption spectrum of Tf-FITC, located at ~280 nm and ~488 nm, respectively. the characteristic emission peak (~520 nm) of FITC appeared in the fluorescence emission spectrum, revealing a successful preparation of Tf-FITC.

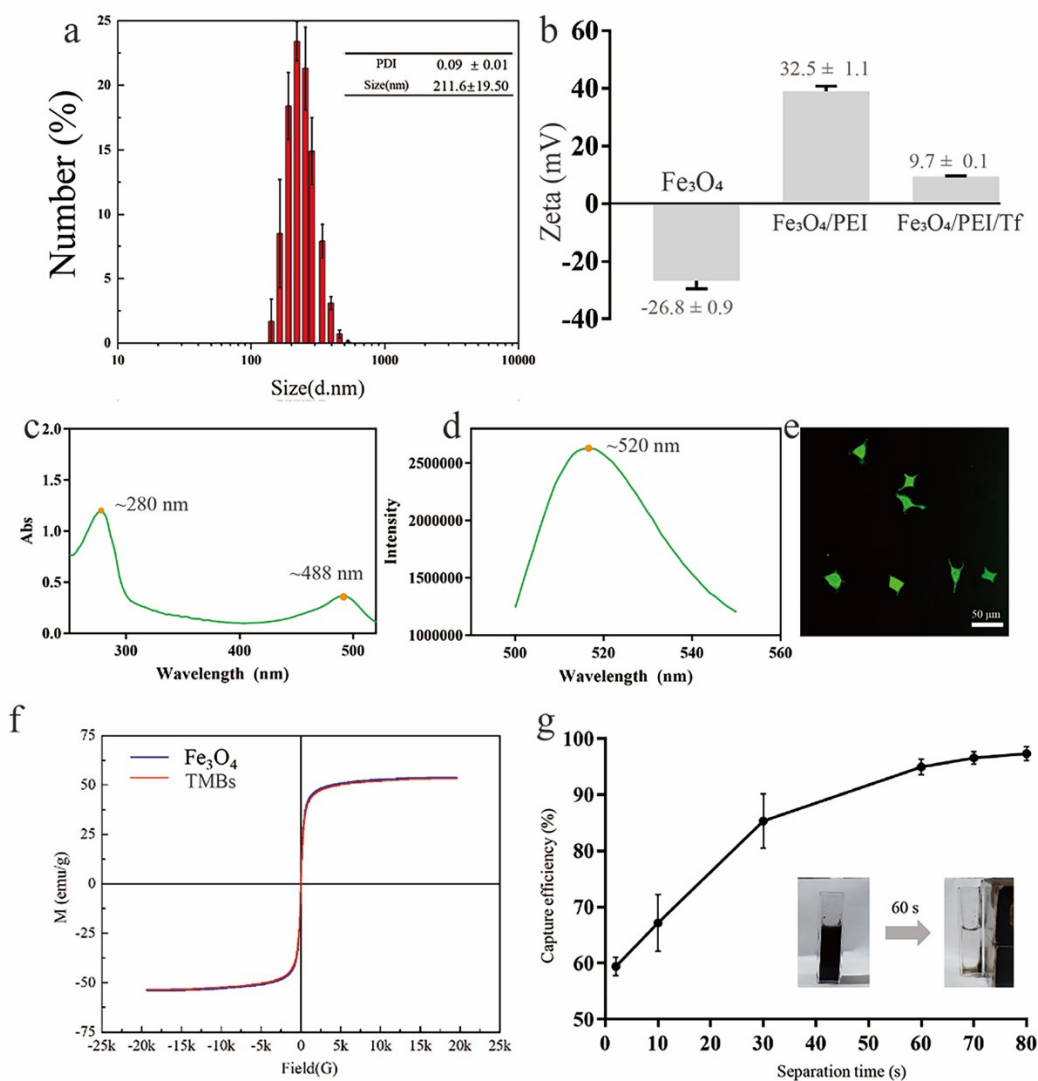

c

**Figure S1.** a) Hydrodynamic size of TMBs. b) Zeta potential of Fe<sub>3</sub>O<sub>4</sub> nanoparticles (Fe<sub>3</sub>O<sub>4</sub>), Fe<sub>3</sub>O<sub>4</sub>/PEI and Fe<sub>3</sub>O<sub>4</sub>/PEI/Tf. c) Ultraviolet-visible absorption spectrum and d) fluorescence emission spectrum of Tf-FITC. e) The CLSM image of MCF-7 cells after incubating with Tf-FITC. f) Magnetic hysteresis loops of Fe<sub>3</sub>O<sub>4</sub> and TMBs. g) Recovery percentage of TMBs at different separation time with magnetic scaffold, the inset graph showed the magnetic separation process after 60 s.

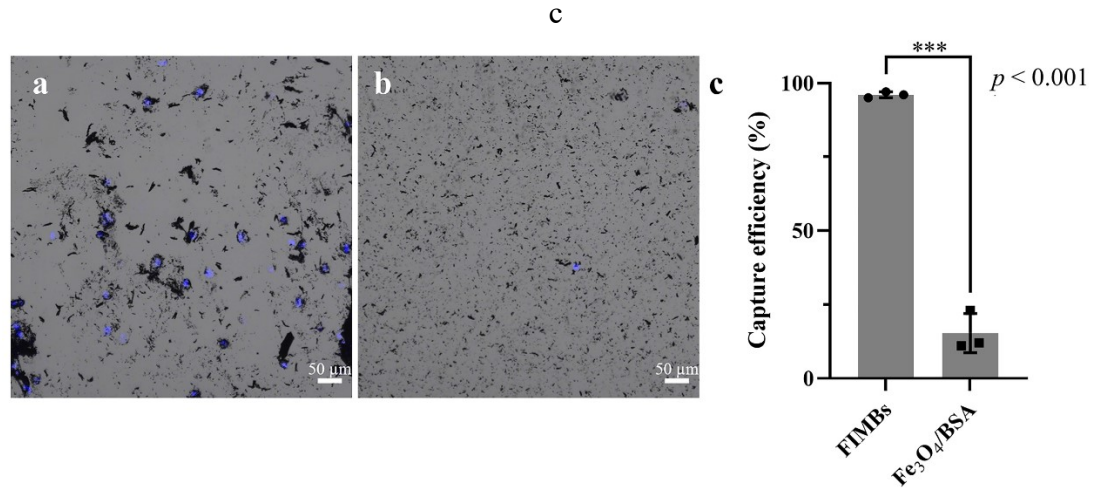

**Figure S2.** The typical CLSM images of captured CTCs (pre-stained with Hoechst 33342) by a) TMB and b) Fe<sub>3</sub>O<sub>4</sub>/BSA. c) Captured performance of TMB and Fe<sub>3</sub>O<sub>4</sub>/BSA. 150 mg functionalized magnetic beads were applied to  $2.5 \times 10^5$  MCF-7 cell in 1 mL PBS for 120 s.

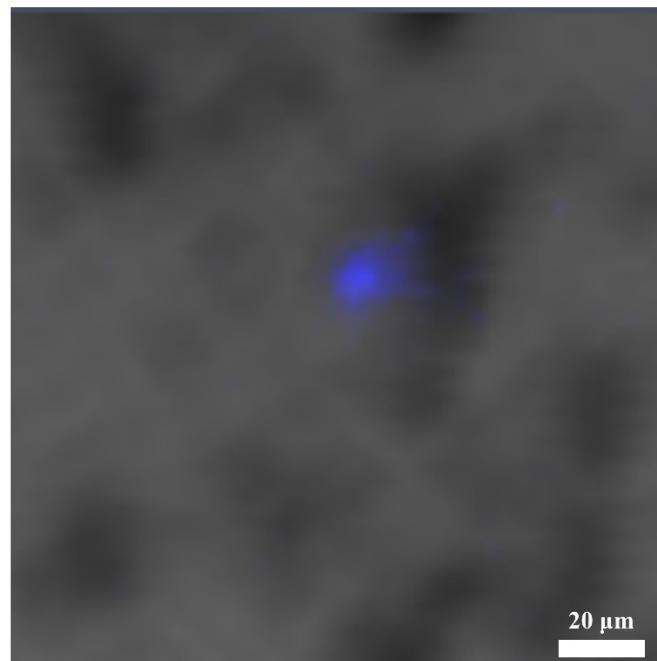

**Figure S3.** The representative CLSM image of CTCs (pre-stained with Hoechst) captured by TMBs in the sensitivity exploration experiment.

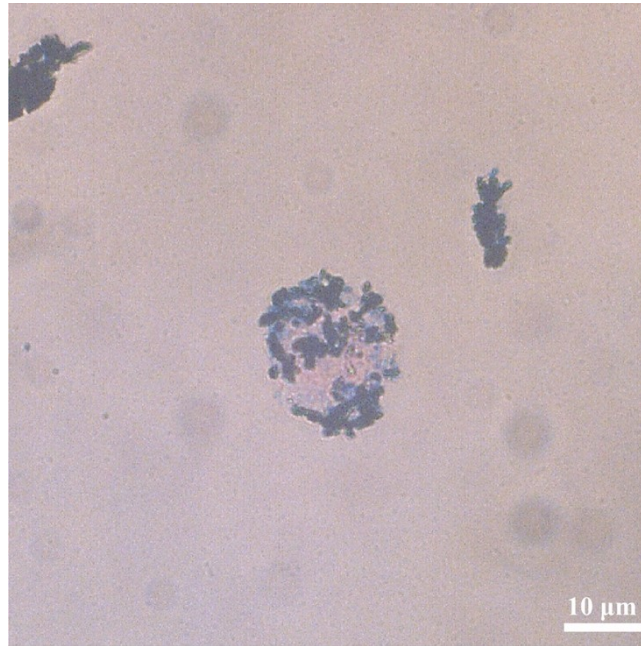

**Figure S4.** Prussian blue staining of one captured CTC.

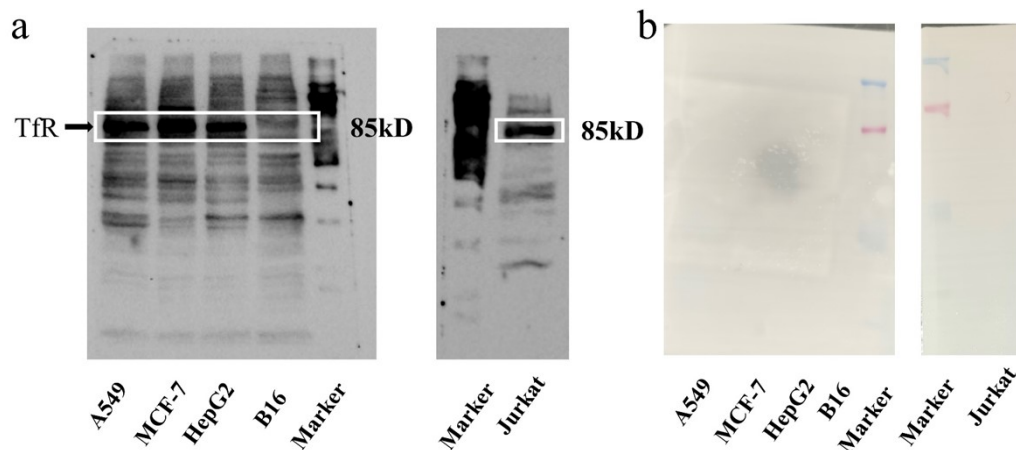

**Figure S5.** (A) Western blot (WB) analyses of transferrin receptor expression in different cell lines, and (B) corresponding raw data of the WB studies.

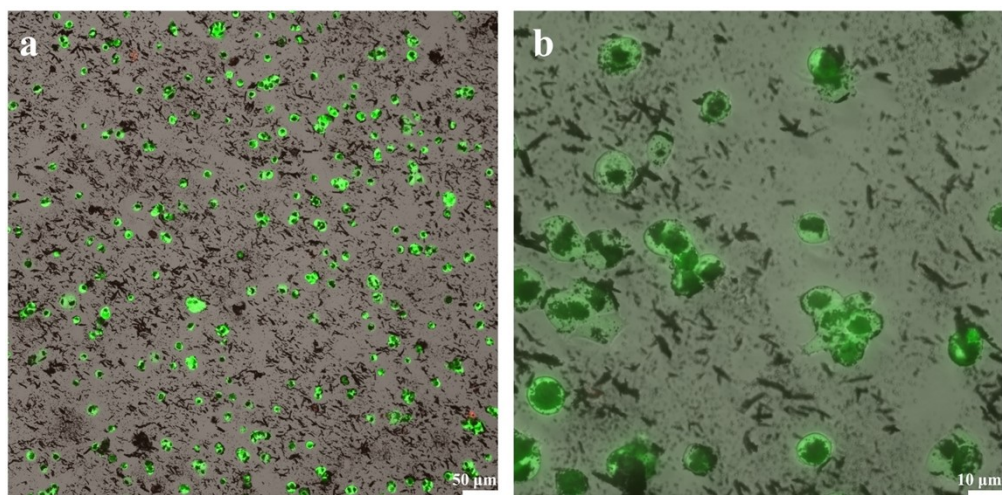

**Figure S6.** Captured cells stained with AM (green) and PI (red) at different magnifications. Acridine orange (AM) produced green fluorescence in live cells, while propidium iodide (PI) produced red signals in dead cells.

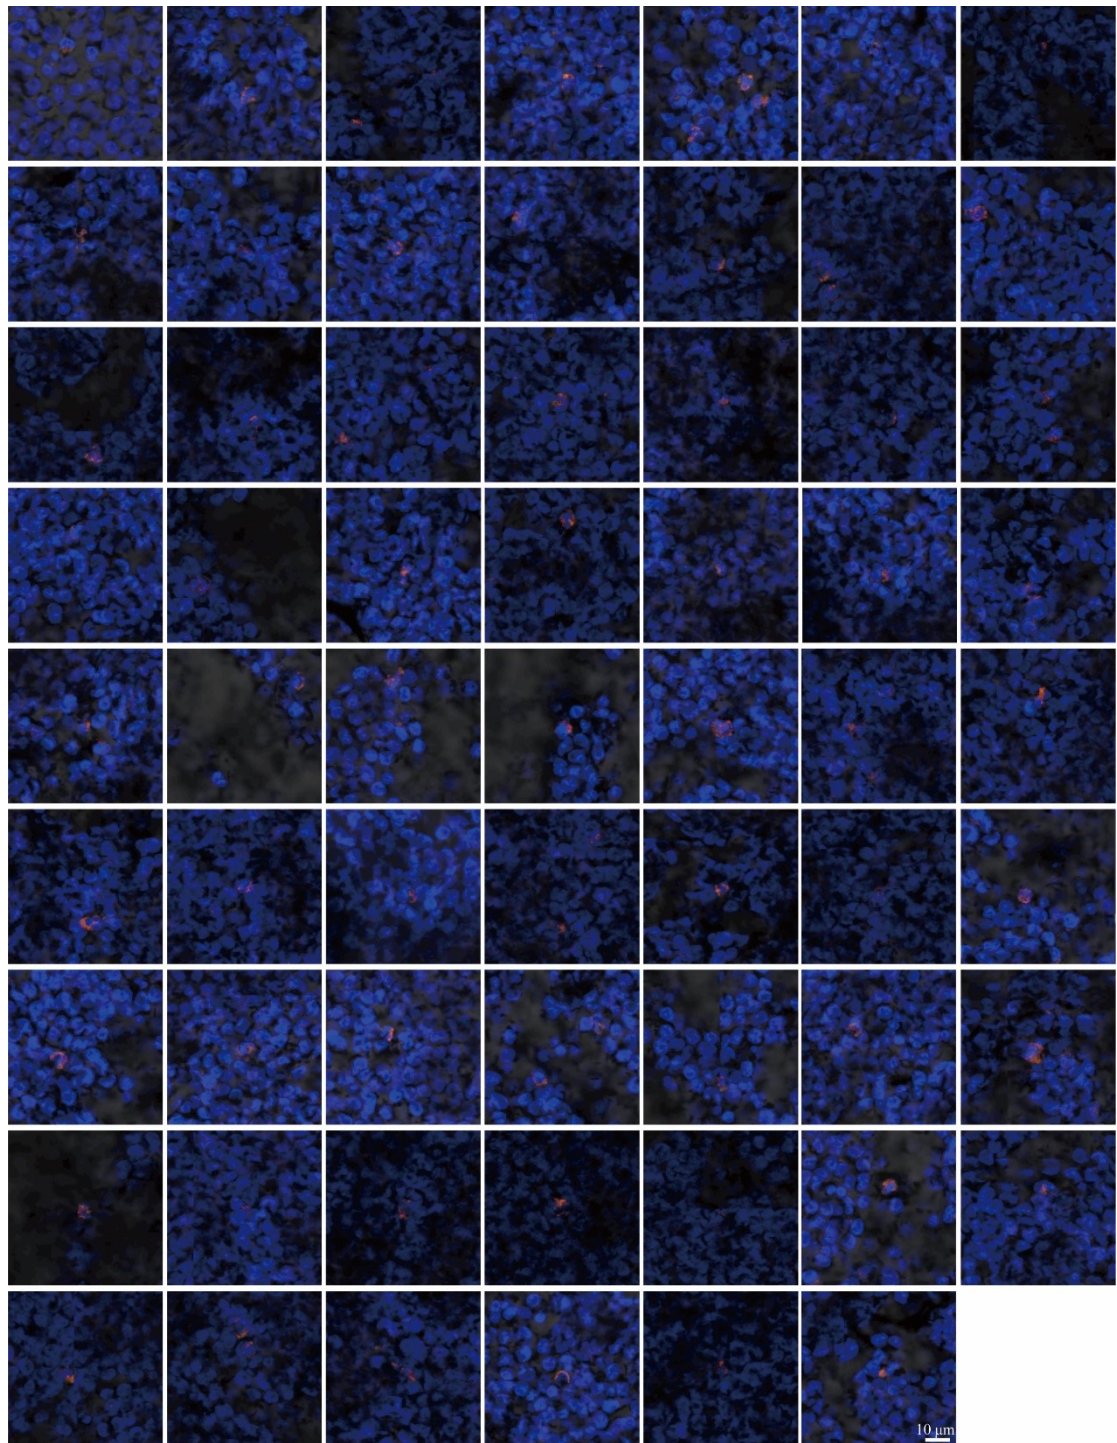

**Figure S7.** The CLSM images of all captured CTCs from a lymphoma patient through the membrane glycoprotein-targeted strategy.

**Table S1.** Information of cancer patients.

| Patient No. | Gender | Age | Cancer Type                        | The stage of cancer | Treatment situation                 |
|-------------|--------|-----|------------------------------------|---------------------|-------------------------------------|
| #1          | Female | 77  | Esophageal squamous cell carcinoma | IV                  | Radiochemotherapy                   |
| #2          | Male   | 74  | Lung adenocarcinoma                | IV                  | Drug targeted therapy               |
| #3          | Male   | 64  | Esophageal squamous cell carcinoma | IV                  | Radiochemotherapy and immunotherapy |
| #4          | Female | 58  | Esophageal squamous cell carcinoma | II                  | Surgical treatment                  |
| #5          | Female | 49  | Clear cell sarcoma                 | IV                  | Surgical treatment                  |
| #6          | Female | 51  | Diffuse large B-cell lymphoma      | IV                  | /                                   |

**Table S2.** Enumeration of captured CTCs that identified by the two methods.

| Patient No. | The number of Captured CTCs identified by ICC/Membrane glycoprotein-targeted strategy (per mL) |
|-------------|------------------------------------------------------------------------------------------------|
| #1          | 54/54                                                                                          |
| #2          | 154/152                                                                                        |
| #3          | 132/223                                                                                        |
| #4          | 127/153                                                                                        |
| #5          | 0/33                                                                                           |
| #6          | 0/63                                                                                           |
